# Supplementary material
Source: HighWire-hosted journal article supplement (https://jnm.snmjournals.org/highwire/filestream/93867/field_highwire_adjunct_files/0/jnm085266_supplemental_data.pdf)
Supplement: jnm085266_supplemental_data.pdf [file jnm085266_supplemental_data.pdf]

## Supplementary Materials and Methods

### *The reference tissue model*

If the reference tissue includes a vascular component and tissue with irreversible FDG uptake, it can be described by a common irreversible two-tissue compartment model including vascular space (Fig 1).

$$\begin{aligned}
 C_R(t) = & v_t C_P(t) + (1 - v_R) K_R \int_0^t dt' C_P(t') \\
 & + (1 - v_R) K_{1R} \left( 1 - \frac{K_R}{K_{1R}} \right) \int_0^t dt' C_P(t') e^{-\frac{K_{1R}}{\lambda_R} \left( \frac{1}{1 - K_R/K_{1R}} \right) (t-t')}
 \end{aligned} \tag{1}$$

Eq. (1) expresses the time course of radioactivity concentration in the reference tissue ( $C_R(t)$ ) as a function of the tracer input ( $C_P(t)$ , plasma radioactivity concentration), the fraction of blood volume in the reference tissue ( $v_R$ ), the unidirectional transport rate constant from blood to tissue ( $K_{1R}$ ), the partition coefficient ( $\lambda_R = K_{1R}/k_{2R}$ ), and the net FDG influx rate constant ( $K_R = K_{1R}k_{3R}/(k_{2R} + k_{3R})$ ) with  $k_{2R}$  being the rate constant for transport from tissue to blood and  $k_{3R}$  the phosphorylation rate constant (see Fig 1).  $v_t = v_R \Phi_t$  with  $\Phi_t$  multiplied by  $C_P(t)$  providing the whole blood radioactivity concentration ( $C_B(t) = \Phi_t C_P(t)$ ).

For constant  $v_t$  Eq. (1) can be transformed into the following inhomogeneous second order differential equation for  $C_P(t)$  with constant coefficients:

$$\begin{aligned}
 v_t \frac{d^2}{dt^2} C_P(t) + & \left( v_t \frac{K_{1R}}{\lambda_R} \frac{1}{1 - \frac{K_R}{K_{1R}}} + (1 - v_R) K_{1R} \right) \frac{d}{dt} C_P(t) \\
 + & (1 - v_R) \frac{K_{1R}}{\lambda_R} \frac{K_R}{1 - \frac{K_R}{K_{1R}}} C_P(t) \\
 = & \frac{K_{1R}}{\lambda_R} \frac{1}{1 - \frac{K_R}{K_{1R}}} \frac{d}{dt} C_R(t) + \frac{d^2}{dt^2} C_R(t).
 \end{aligned} \tag{2}$$

Taking into account the initial conditions  $C_P(0) = 0$  and  $\frac{d}{dt}C_P(0) = 0$  the solution can be calculated by first solving the homogeneous equation and then constructing a particular solution from the homogeneous solution by variation of the constants to obtain:

$$C_P(t) = \frac{1}{v_t}C_R(t) + \chi_+ \int_0^t dt' C_R(t') e^{-\sigma_+(t-t')} + \chi_- \int_0^t dt' C_R(t') e^{-\sigma_-(t-t')} \quad (3)$$

with

$$\sigma_{\pm} = \frac{1}{2} \left( \frac{K_{1R}}{\lambda_R} \frac{1}{1 - K_R/K_{1R}} + \frac{1 - v_R}{v_t} K_{1R} \right) \quad (4)$$

$$\pm \sqrt{\frac{1}{4} \left( \frac{K_{1R}}{\lambda_R} \frac{1}{1 - K_R/K_{1R}} + \frac{1 - v_R}{v_t} K_{1R} \right)^2 - \frac{1 - v_R}{v_t} \frac{K_{1R}}{\lambda_R} \frac{K_R}{1 - K_R/K_{1R}}} \\ \chi_{\pm} = \pm \frac{1}{v_t} \frac{\sigma_{\pm}^2 - \frac{K_{1R}}{\lambda_R} \frac{1}{1 - K_R/K_{1R}} \sigma_{\pm}}{\sigma_- - \sigma_+}. \quad (5)$$

Eq. (3) is only a solution for Eq. (1) and Eq. (2) for  $v_t = v_R \Phi_t$  being constant in time. However,  $\Phi_t$  is time dependent. Huang et al. determined a functional expression in mouse blood, which we use here:  $\Phi_t = 1/(1.09 + 0.39 \exp\{-0.072t\})$ , with  $t$  the time after bolus injection in minutes (1). In order to calculate  $C_P(t)$  taking into account the time dependence of the ratio of whole blood to plasma radioactivity concentration ( $\Phi_t$ ), the solution can be derived using sufficiently small time intervals during which  $\Phi_t$  can be assumed to be constant and Eq. (3) is the correct solution. Therefore we first re-write Eq. (3) in the following way:

$$F(t_0 + \Delta t) = C_P(t_0 + \Delta t) - \frac{1}{v_t} C_R(t_0 + \Delta t) \\ = \chi_+ \int_{t_0}^{t_0 + \Delta t} dt' C_R(t') e^{-\sigma_+(t_0 + \Delta t - t')} \quad (6)$$

$$\begin{aligned}
& +\chi_- \int_{t_0}^{t_0+\Delta t} dt' C_R(t') e^{-\sigma_-(t_0+\Delta t-t')} \\
& +e^{-\sigma_+(\Delta t)} G_+(t_0) \\
& +e^{-\sigma_-(\Delta t)} G_-(t_0).
\end{aligned}$$

The integral expressions on the right-hand side contain only contributions from time  $t \geq t_0$ . All contributions from  $t \leq t_0$  are summarized in the functions  $G_{\pm}(t_0)$ , which are explicitly given by:

$$G_{\pm}(t_0) = \chi_{\pm} \int_0^{t_0} dt' C_R(t') e^{-\sigma_{\pm}(t_0-t')}. \quad (7)$$

Analogous to Eq. (6), the temporal derivative of  $F(t)$  is given by:

$$\begin{aligned}
F'(t_0 + \Delta t) &= (\chi_+ + \chi_-) C_R(t_0 + \Delta t) \\
& -\sigma_+ \chi_+ \int_{t_0}^{t_0+\Delta t} dt' C_R(t') e^{-\sigma_+(t_0+\Delta t-t')} \\
& -\sigma_- \chi_- \int_{t_0}^{t_0+\Delta t} dt' C_R(t') e^{-\sigma_-(t_0+\Delta t-t')} \\
& -\sigma_+ e^{-\sigma_+(\Delta t)} G_+(t_0) \\
& -\sigma_- e^{-\sigma_-(\Delta t)} G_-(t_0).
\end{aligned} \quad (8)$$

Taking Eq. (3) and Eq. (7)  $G_{\pm}(t_0)$  can be expressed in terms of  $F(t_0)$  and  $F'(t_0)$  as

$$G_{\pm}(t_0) = \pm \frac{1}{\sigma_- - \sigma_+} (\sigma_{\mp} F(t_0) - F'(t_0) - (\chi_+ - \chi_-) C_R(t_0)). \quad (9)$$

$C_P(t)$  can then be calculated in the following way:

1. Starting point:  $t_0 = 0$ .
2. Determine  $\Delta t$  such that  $\frac{\Phi_{t_0+\Delta t}}{\Phi_{t_0}} = acc$ , where  $acc$  is the desired accuracy. (Here we used  $acc = 1.001$ ).

3. Calculate  $\sigma_{\pm}$  and  $\chi_{\pm}$  with  $v_t = v_R\Phi_{t_0}$  using Eq. (4) and Eq. (5).
4. Calculate  $F(t_0 + \Delta t)$  and  $F'(t_0 + \Delta t)$  using Eq. (6) and Eq. (8) (Note that  $G_{\pm}(0) = 0$  (Eq. (7))).
5. Calculate  $G_{\pm}(t_0 + \Delta t)$  using Eq. (9).
6. Set  $t_0$  to  $t_0 + \Delta t$  and continue with step 2. Repeat the whole procedure until time  $t$  is reached.
7.  $C_P(t)$  is then given by  $C_P(t) = F(t) + C_R(t)/v_t$ .
8. Whole blood radioactivity concentration is then given by  $C_B(t) = \Phi_t C_P(t)$ .

If the kinetic parameters of the reference tissue ( $v_R, K_{1R}, \lambda_R, K_R$ ) are known, the tracer input function and whole blood radioactivity concentration can be calculated from the reference tissue time activity curve (TAC) using the procedure introduced above.

*The 2-compartment model with 4 rate constants*

FDG kinetics in cerebral tissue can be described by a two-compartment model with four rate constants ( $K_1, k_2, k_3, k_4$ ) and the fractional blood volume ( $v_B$ ) (2)

$$C_T(t) = v_B C_B(t) + (1 - v_B) \left( A_- \int_0^t dt' C_P(t') e^{-r_-(t-t')} - A_+ \int_0^t dt' C_P(t') e^{-r_+(t-t')} \right) \quad (10)$$

with

$$r_{\pm} = \frac{k_2 + k_3 + k_4}{2} \pm \frac{1}{2} \sqrt{(k_2 + k_3 + k_4)^2 - 4k_2k_4}$$

$$A_{\pm} = \frac{K_1}{r_+ - r_-} (k_3 + k_4 - r_{\pm}).$$

### *Reversible reference tissue*

Given that the kinetic rate constants are known, the input function can also be derived from a reversible reference tissue ( $k_{4R} \neq 0$ ). The radioactivity concentration in the reference tissue is then given by Eq. (10). Solving for  $C_P(t)$  the solution is the same as Eq. (3) but with different parameters:

$$\sigma_{\pm} = \frac{1}{2} \left( (1 - v_B)(A_- - A_+) + \frac{1}{v_t}(r_+ - r_-) \right) \quad (11)$$

$$\pm \sqrt{\frac{\frac{1}{4} \left( (1 - v_B)(A_- - A_+) + \frac{1}{v_t}(r_+ - r_-) \right)^2}{-r_+r_- + (1 - v_B)(A_+r_- - A_-r_+)}}$$
$$\chi_{\pm} = \pm \frac{(\sigma_{\pm} - r_+)(\sigma_{\pm} - r_-)}{\sigma_- - \sigma_+}. \quad (12)$$

Again this solution is only valid for constant  $v_t$ . The full solution can be derived following the same procedure as for the irreversible tissue but with  $\sigma_{\pm}$  and  $\chi_{\pm}$  in step 3 calculated from Eq. (11) and Eq. (12).

### *Parameters for variable lumped constant*

Hasselbalch and colleagues have determined the values  $L_1 = 1.48$  and  $L_3/L_2 = 0.26$  in humans (3, 4). In their work they compare  $L_1$  with the values of this parameter for rats reported in literature and come to the conclusion that there is no species difference (3). Also their value of  $L_3 = 0.38$  agrees well with the value of 0.37 obtained in rats by Cunningham and Cremer (5).  $L_2$  is assumed to be equal to  $L_1$  (which is equivalent to the assumption that  $K_{1,glc}/k_{2,glc} = K_1/k_2$ ). For the calculations presented here we used the values determined by Hasselbalch et al. (3, 4).

## References

1. Huang SC, Zhang X, Wong KP. Determination of fdg transport kinetics and partition coefficient between plasma and red blood cells in mouse in vivo. *J Cereb Blood Flow Metab* 2007;27(SUPPL. 1):PO05–06U.
2. Phelps ME, Huang SC, Hoffman EJ, Selin C, Sokoloff L, Kuhl DE. Tomographic measurement of local cerebral glucose metabolic rate in humans with (F-18)2-fluoro-2-deoxy-D-glucose: validation of method. *Ann Neurol* 1979;6(5):371–88.
3. Hasselbalch SG, Knudsen GM, Holm S, Hageman LP, Capaldo B, Paulson OB. Transport of D-glucose and 2-fluorodeoxyglucose across the blood-brain barrier in humans. *J Cereb Blood Flow Metab* 1996;16(4):659–66.
4. Hasselbalch SG, Madsen PL, Knudsen GM, Holm S, Paulson OB. Calculation of the FDG lumped constant by simultaneous measurements of global glucose and fdg metabolism in humans. *J Cereb Blood Flow Metab* 1998;18(2):154–60.
5. Cunningham VJ, Cremer JE. A method for the simultaneous estimation of regional rates of glucose influx and phosphorylation in rat brain using radiolabeled 2-deoxyglucose. *Brain Res* 1981;221(2):319–30.

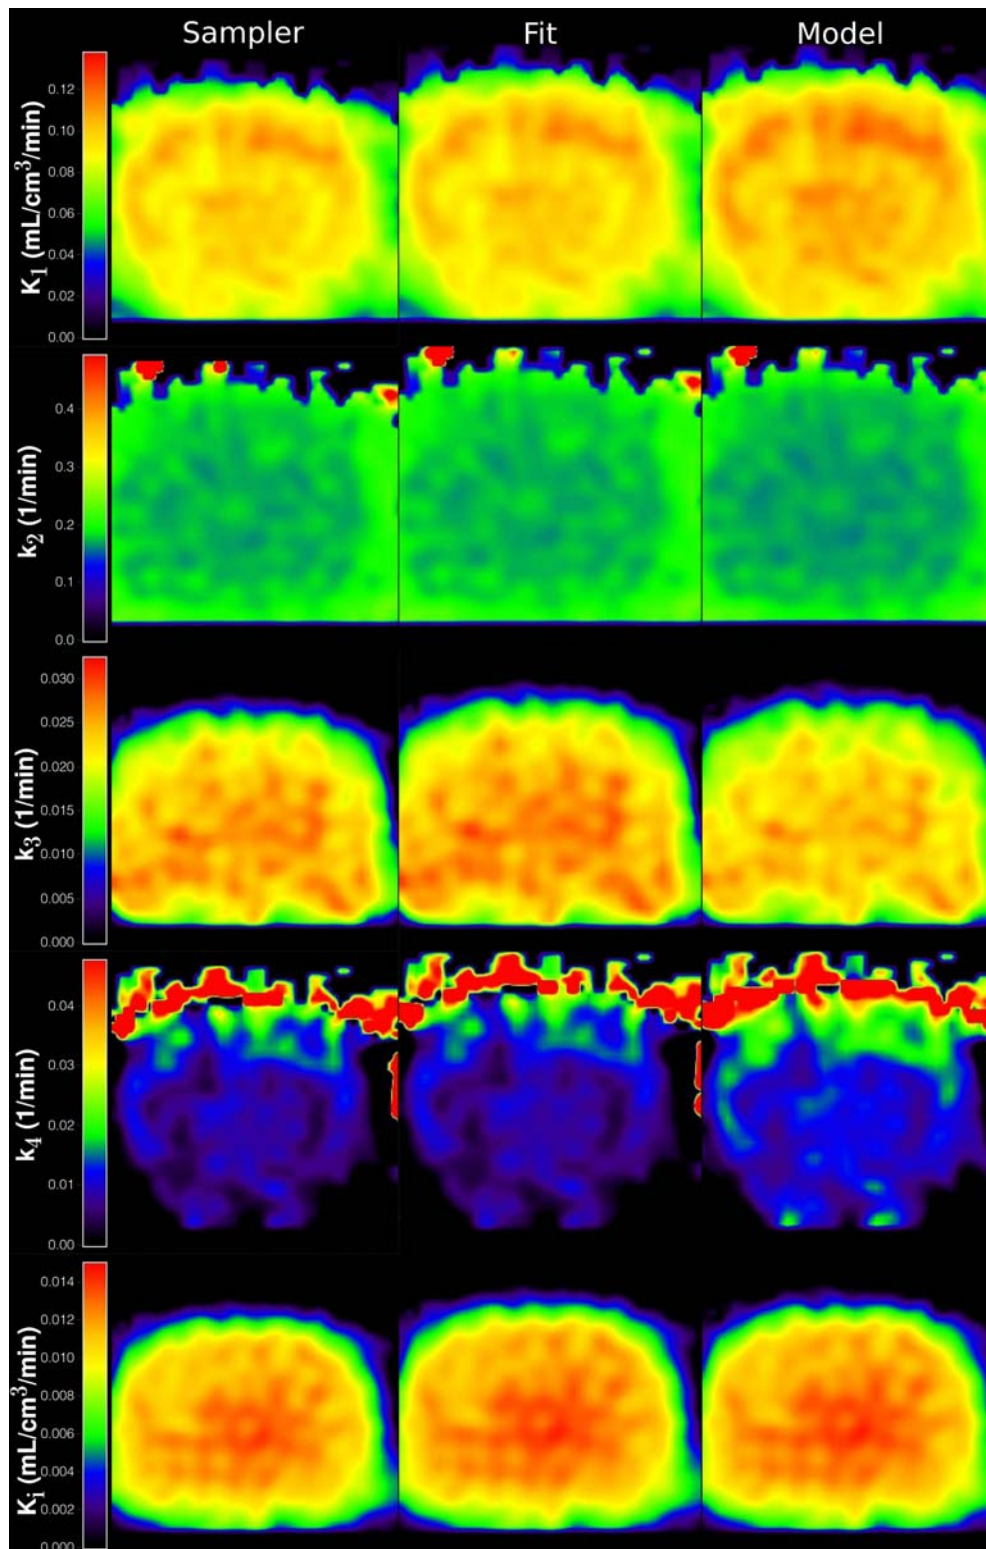

**SUPPLEMENTAL FIGURE 1** Parametric images resulting from kinetic modeling using the sampled input function (IF, 1st row), the reference TAC with individually fitted reference parameters (Fit, 2nd row), and the reference TAC with average reference kinetic parameters (Mod, last row)

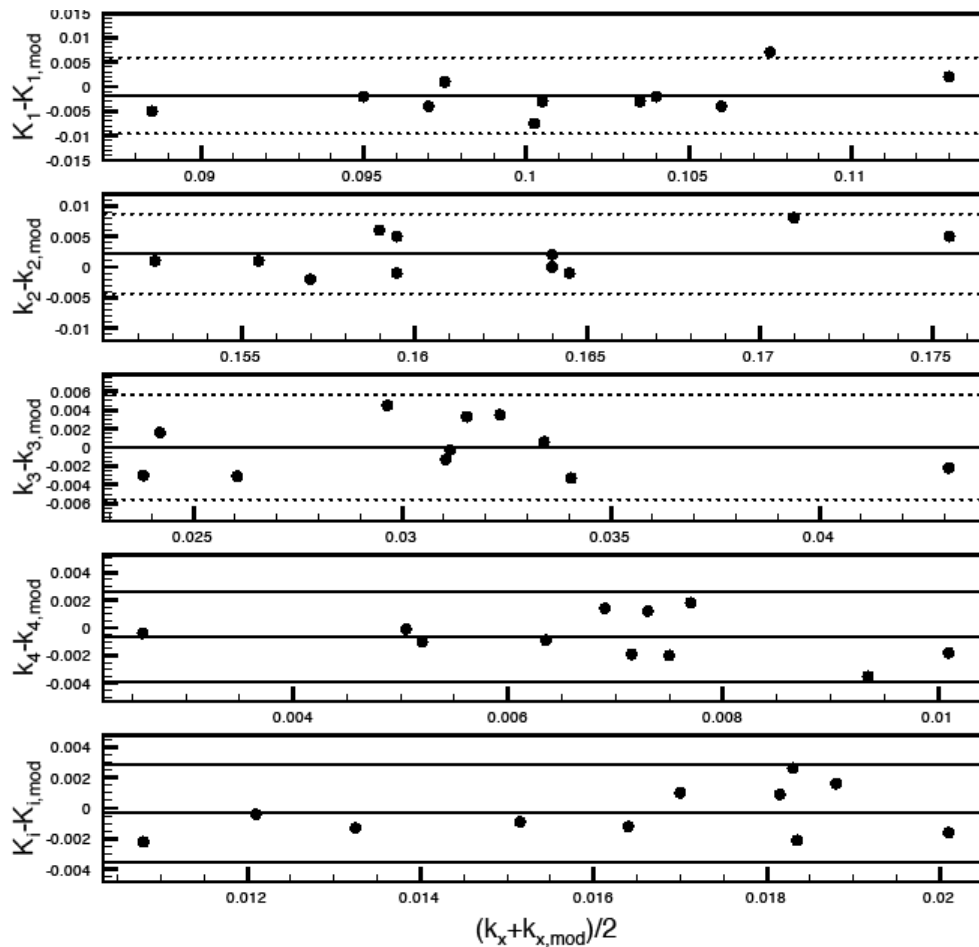

**SUPPLEMENTAL FIGURE 2** Bland-Altman plots of the whole brain kinetic parameters calculated with the reference tissue model with fixed reference kinetic parameters (*mod*) and parameters calculated with the measured input function from blood sampling. Solid lines indicate the mean difference and dashed lines indicate the mean  $\pm$ 1.96 times the standard deviation of the difference. In the label of the *x*-axis: *x* is a replacement character for 1,2,3,4,*i* depending on the parameter plotted.  $K_1$  and  $K_i$  are in ml/cm<sup>3</sup>/min,  $k_2$ ,  $k_3$ ,  $k_4$  in 1/min.



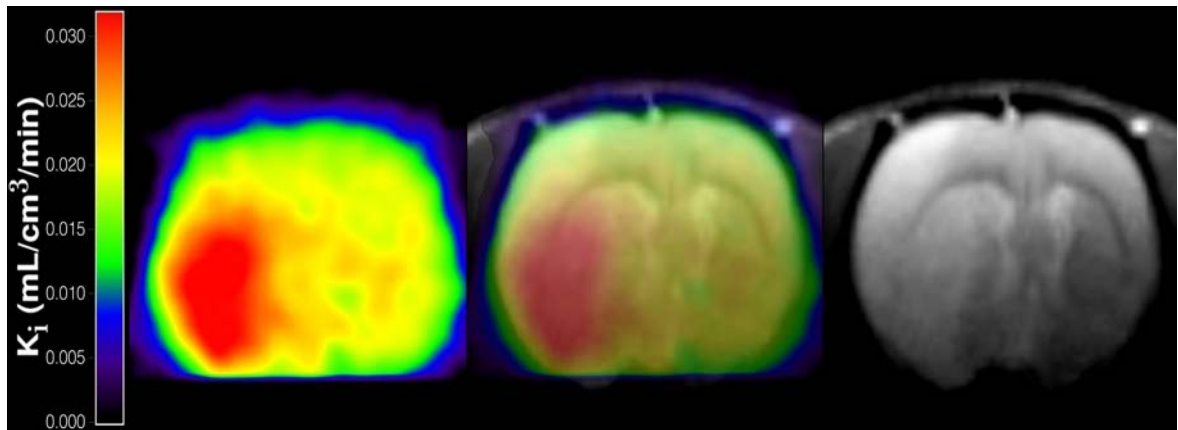

**SUPPLEMENTAL FIGURE 3** T2 weighted MRI performed on a 4.7 T BioSpect system (Bruker BioSpin, Ettlingen, Germany) 24 hours after induction of ischemia (right), parametric image of the net influx rate constant  $K_i$  one hour after induction of ischemia (left), and fused images (middle). Images were co-registered using the VINCI software (see reference (15) in main manuscript).
